# Supplementary material for: Knock-down of pantothenate kinase 2 severely affects the development of the nervous and vascular system in zebrafish, providing new insights into PKAN disease
Source: PubMed Central journal article supplement (PMC4684146; doi:10.1016/j.nbd.2015.10.010), 2016-01
Supplement: mmc1.pdf [file mmc1.pdf]

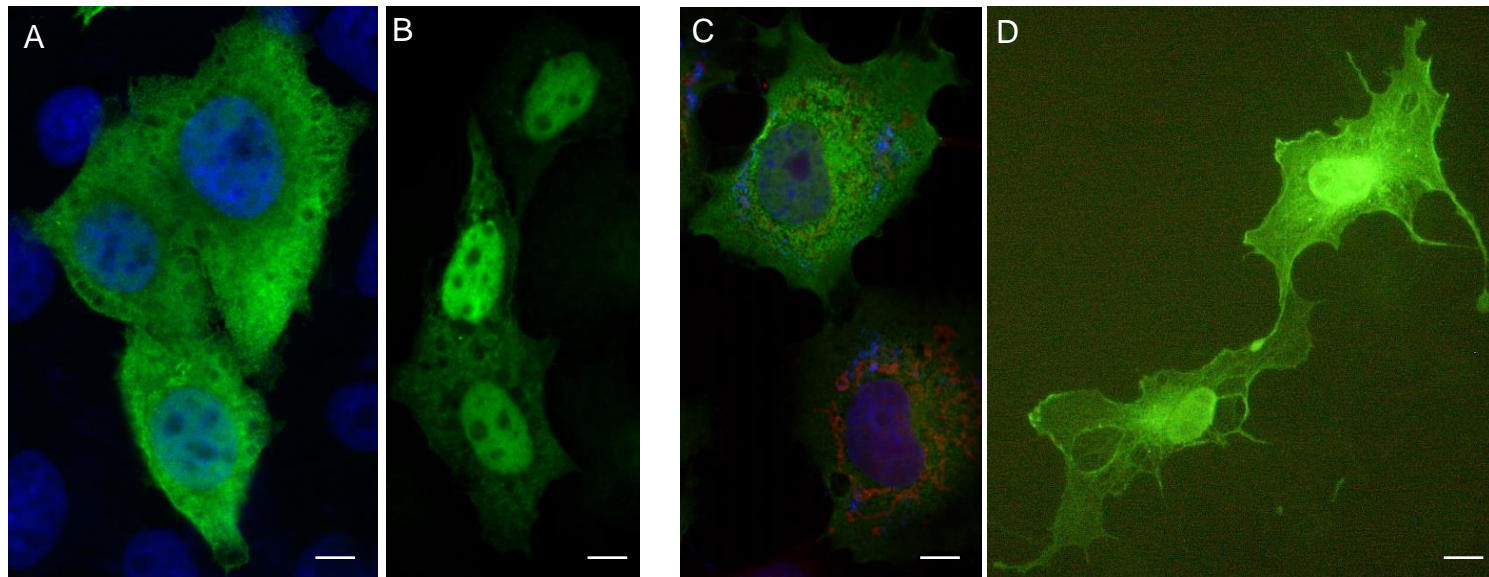

WISH with *pank2* sense probe

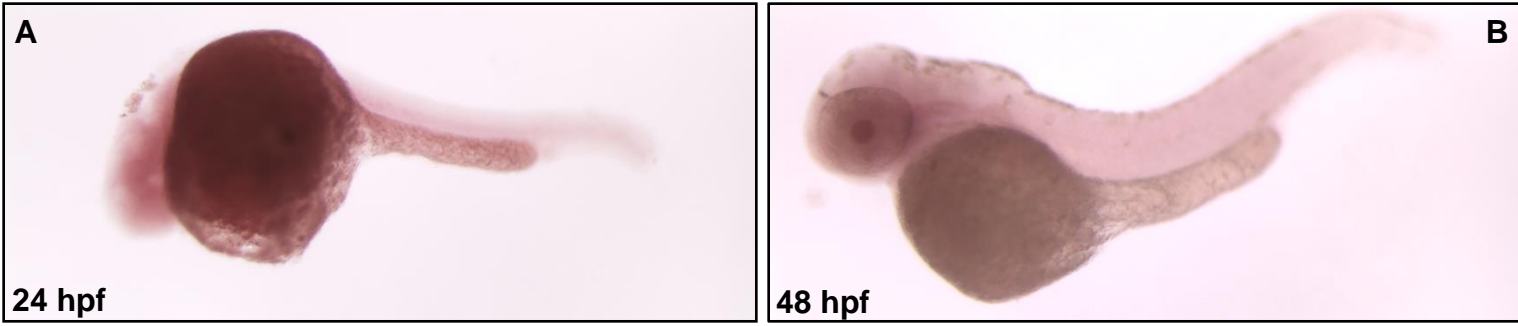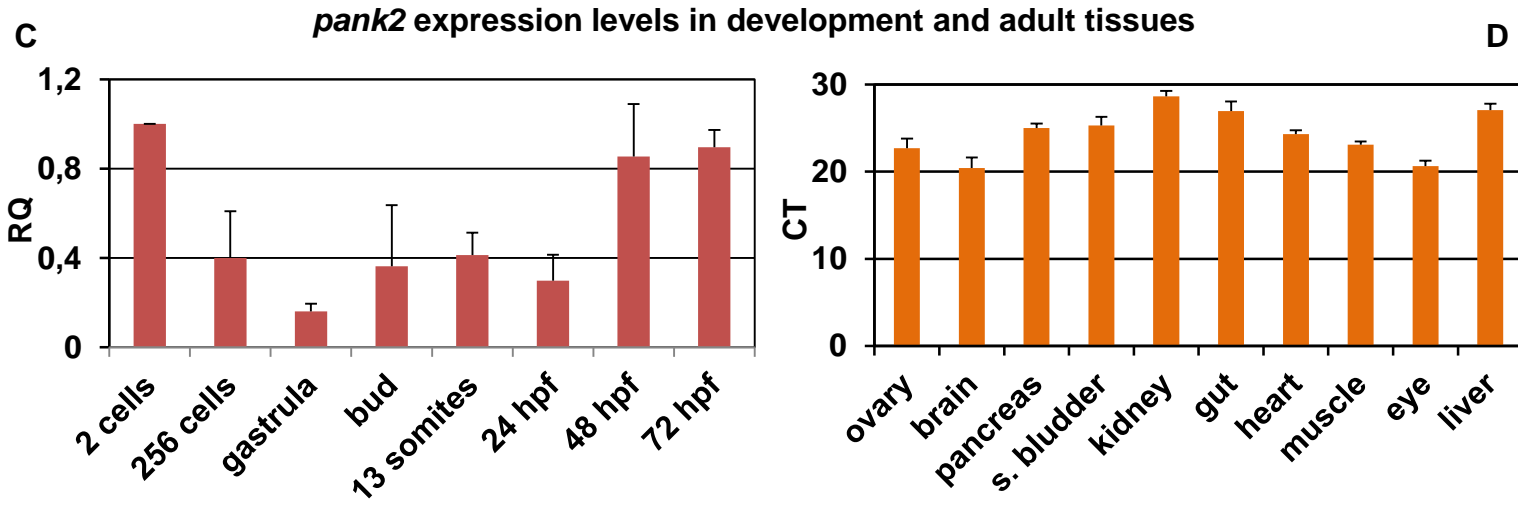

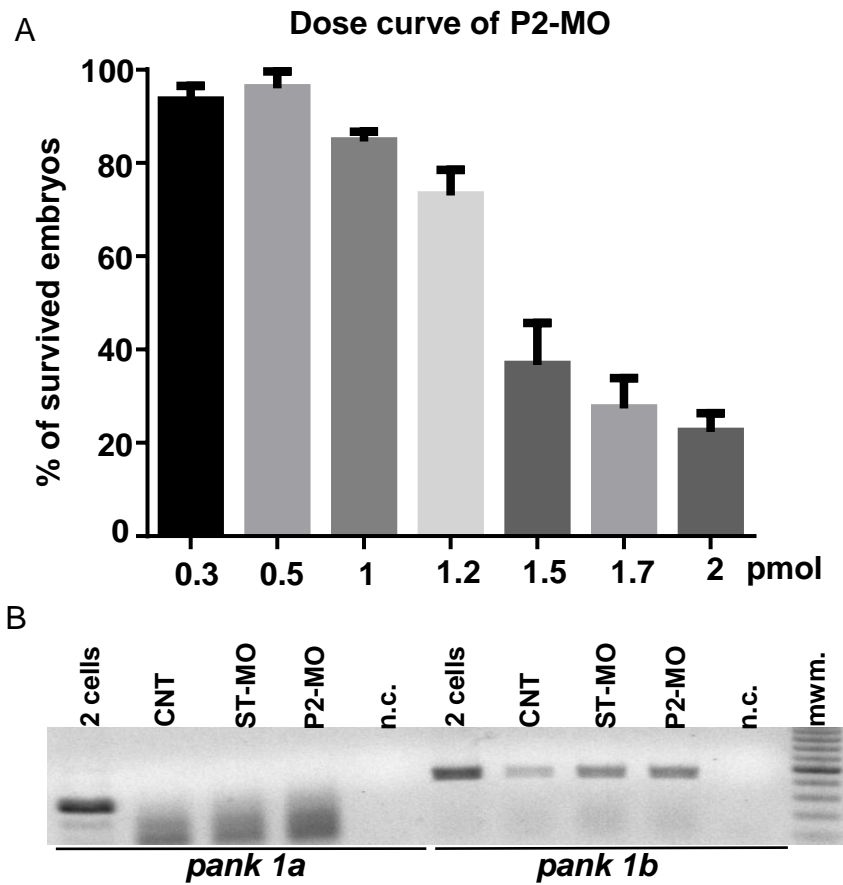

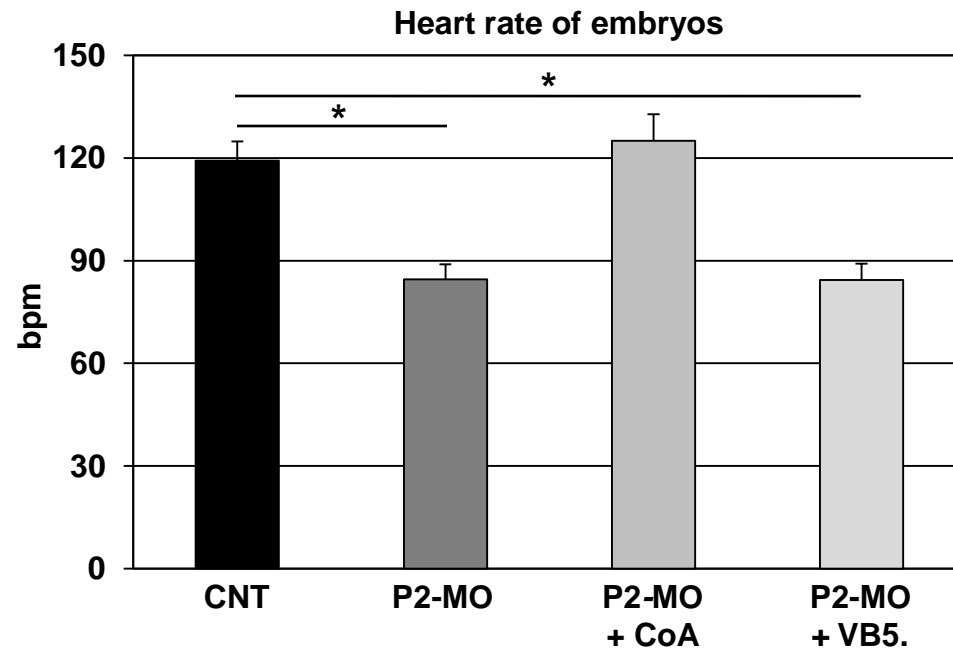

Pantethine dose curve

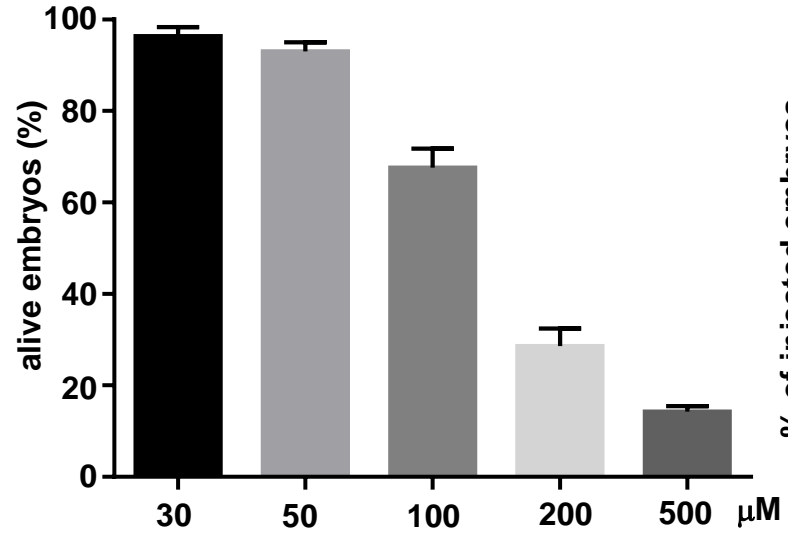

Rescue of P2-MO-injected embryos by pantethine

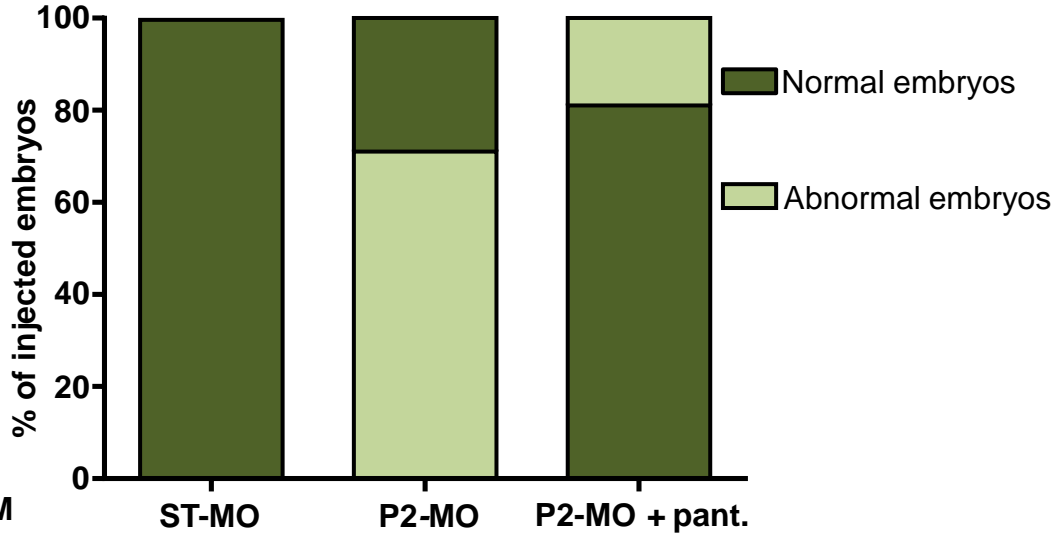

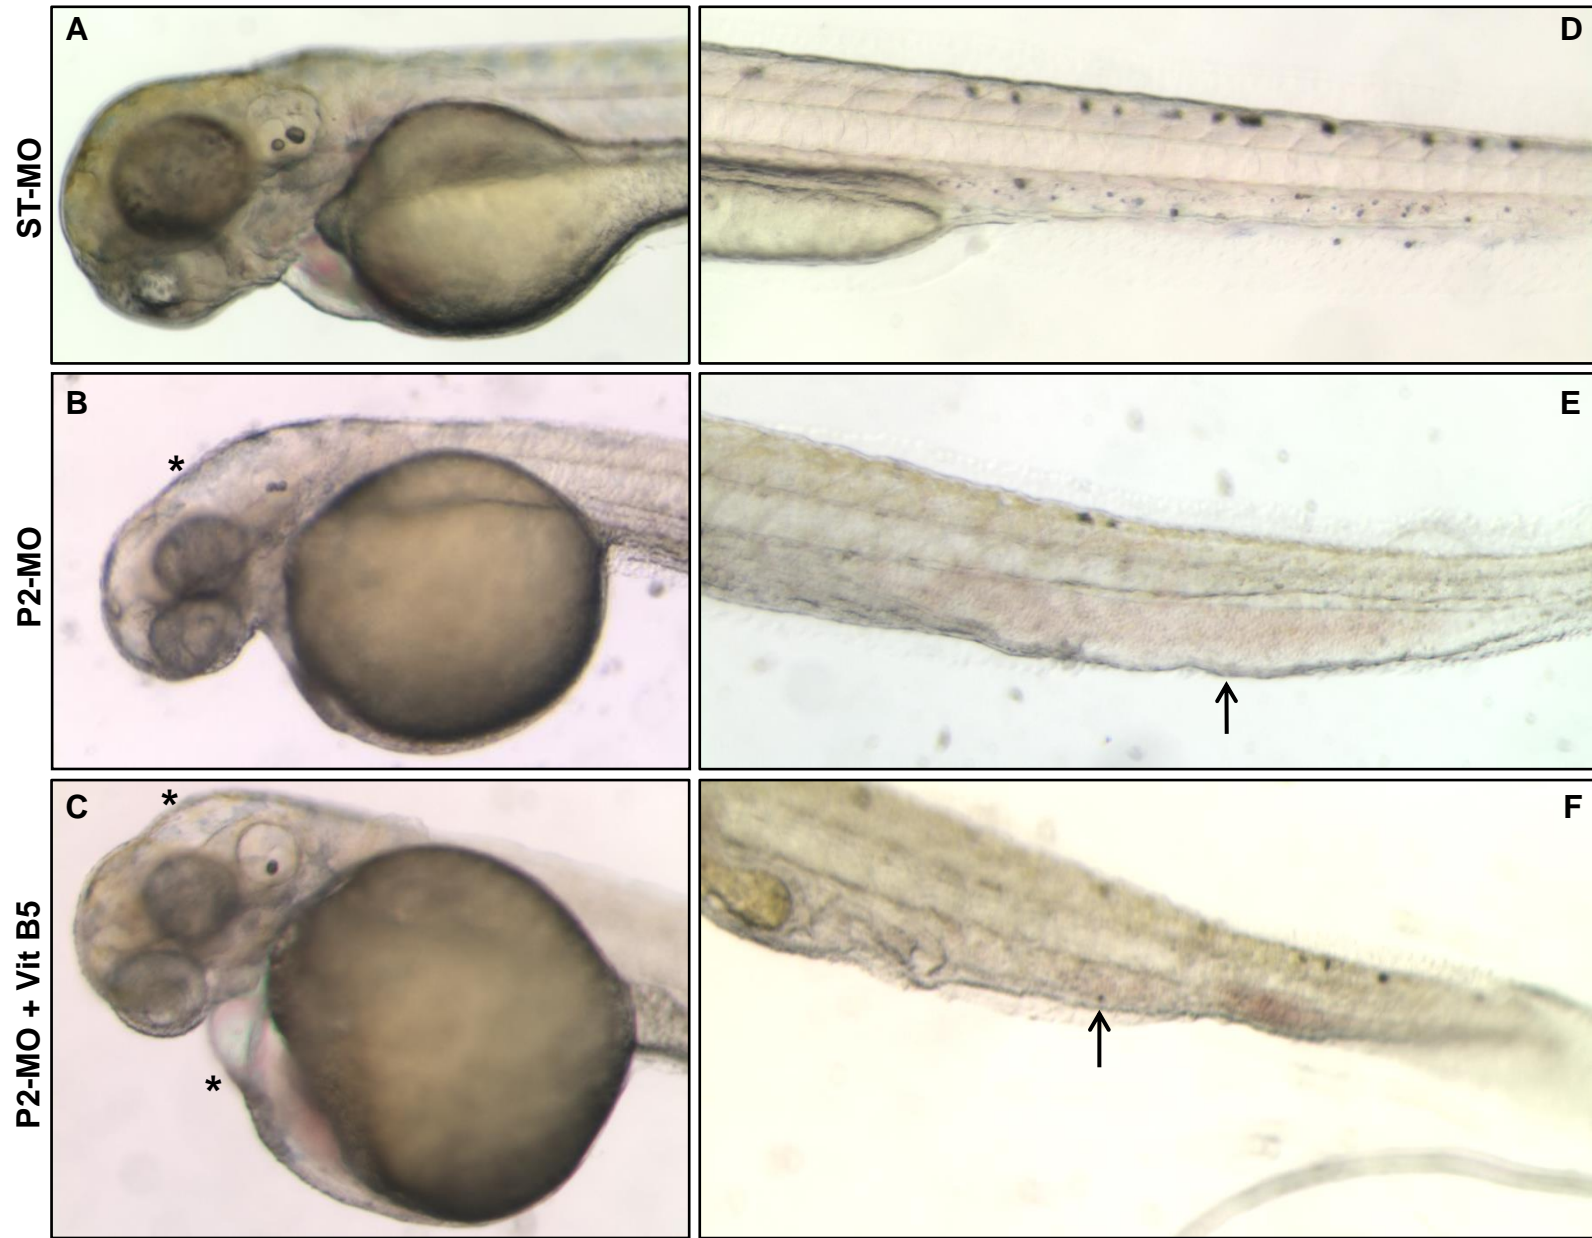

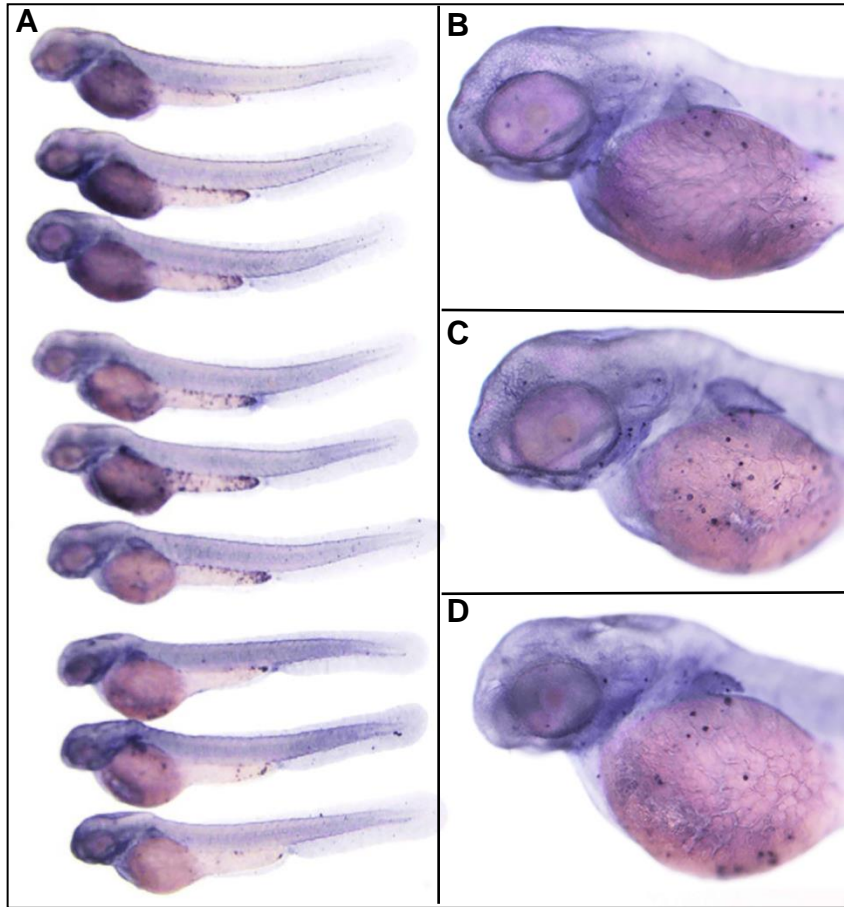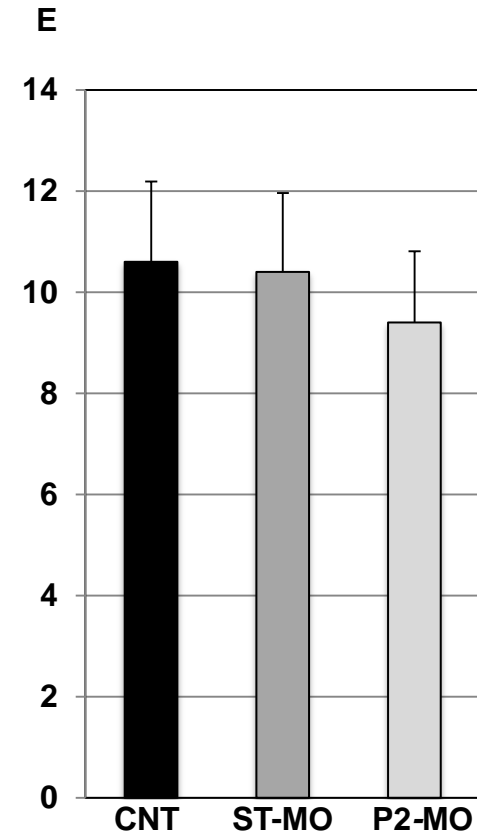

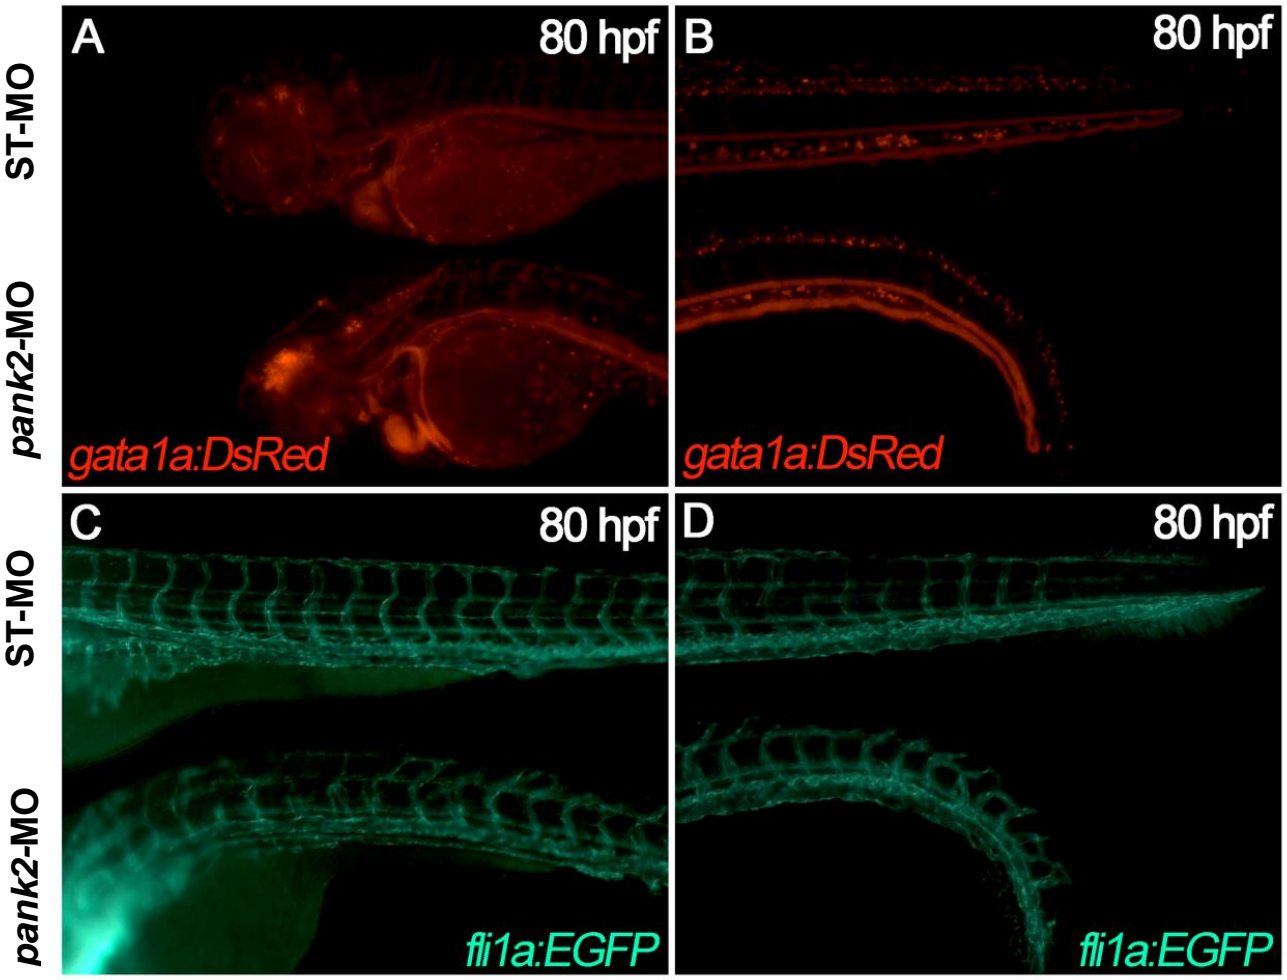



| <b>Organism</b>                | <b>Abbreviation</b> | <b>Protein</b> | <b>Accession n.</b> |
|--------------------------------|---------------------|----------------|---------------------|
| <i>Homo sapiens</i>            | Hsa                 | PANK1          | NP_683878           |
| <i>Homo sapiens</i>            | Hsa                 | PANK2          | NP_705902           |
| <i>Homo sapiens</i>            | Hsa                 | PANK3          | NP_078870           |
| <i>Homo sapiens</i>            | Hsa                 | PANK4          | NP_060686           |
| <i>Mus musculus</i>            | Mmu                 | PANK1          | NP_001107811        |
| <i>Mus musculus</i>            | Mmu                 | PANK2          | NP_705721           |
| <i>Mus musculus</i>            | Mmu                 | PANK3          | NP_666074           |
| <i>Mus musculus</i>            | Mmu                 | PANK4          | NP_766578           |
| <i>Gallus gallus</i>           | Gga                 | PANK1          | XP_421664           |
| <i>Gallus gallus</i>           | Gga                 | PANK2          | XP_420873           |
| <i>Gallus gallus</i>           | Gga                 | PANK3          | XP_414502           |
| <i>Gallus gallus</i>           | Gga                 | PANK4          | NP_001231841        |
| <i>Danio rerio</i>             | Dre                 | Pank1a         | NP_998645           |
| <i>Danio rerio</i>             | Dre                 | Pank1b         | NP_001077310        |
| <i>Danio rerio</i>             | Dre                 | Pank2          | NP_001074075        |
| <i>Danio rerio</i>             | Dre                 | Pank4          | NP_956809           |
| <i>Drosophila melanogaster</i> | Dme                 | fumble         | NP_524870           |
| <i>Tricomonas vaginalis</i>    | Tva                 | fumble         | XP_001290292        |

**Table ST1.** List of amino acid sequences used for multiple alignment (only PANK2 polypeptides) and phylogenetic analysis.

| Name  | Primer sequence (5'→3')                                         |
|-------|-----------------------------------------------------------------|
| P2-MO | TAACAAGATGGTTCACCTACGCGGC                                       |
| ST-MO | CCTCTTACCTCAGTTACAATTTATA                                       |
| P1    | TCCATGAAGTTGCTCGCGTA                                            |
| P2    | CAGCTCAGGATGGGTTTGGT                                            |
| P3    | ACCTGCTAGCATGGAGCTGAACGGCTTC                                    |
| P4    | ACCTGGATCCTCACTTGTTCATCGTCATCCTTGTAATCGGATGG<br>GTTTGGTAGTTCCAA |
| P5    | ATGGAGCTGAACGGCTTCC                                             |
| P6    | TCAGGATGGGTTTGGTAGTTCC                                          |
| P7    | GCTGGATGAGCTGGAGTGTT                                            |
| P8    | AACACTCCAGCTCATCCAGC                                            |
| P9    | ACCTGGATCCACCATGGAGCTGAACGGCTTC                                 |
| P10   | ACCTTCTAGATCAGGATGGGTTTGGTAGTTC                                 |
| P11   | CGAGGGATGTACGGAGAAGC                                            |
| P12   | GCCAATGTTGACAAGCAGCA                                            |
| A1    | CGAGCAGGAGATGGGAACC                                             |
| A2    | CAACGGAAACGCTCATTGC                                             |
| EF1   | GAGAAGTTCGAGAAGGAAGC                                            |
| EF2   | CGTAGTATTTGCTGGTCTCG                                            |

**Table ST2.** List of the primers and their sequences.
